1                   **Effects of Superhydrophobic Sand Mulching on**  
2                   **Evapotranspiration and Phenotypic Responses in Tomatoes**  
3                   **(*Solanum lycopersicum*) under Normal and Reduced Irrigation**

4                   Kennedy Odokonyero, Adair Gallo Jr., Vinicius Dos Santos, and Himanshu Mishra\*

5  
6                   King Abdullah University of Science and Technology, Water Desalination and Reuse  
7                   Center, Division of Biological and Environmental Sciences and Engineering, Thuwal  
8                   23955 - 6900 Saudi Arabia

9  
10  
11                  **Correspondence Email:** [\\*Himanshu.Mishra@kaust.edu.sa](mailto:Himanshu.Mishra@kaust.edu.sa)

12  
13                  **Abstract**

14                  Irrigated agriculture in arid and semi-arid regions is a vital contributor to the global food  
15                  supply; however, these regions endure massive evaporative losses that are compensated by  
16                  unsustainable freshwater withdrawals. Plastic mulches have been used to curtail  
17                  evaporation, improve water-use efficiency, and ensure food–water security, but they are  
18                  non-biodegradable and their disposal is unsustainable. We recently developed  
19                  superhydrophobic sand (SHS), which comprises sand grains with a nanoscale wax coating  
20                  that could offer a more sustainable mulching solution. Here, the effects of adding a 1.0 cm-  
21                  thick layer of SHS mulch on the evapotranspiration and phenotypic responses of tomato  
22                  (*Solanum lycopersicum*) plants are studied under normal and reduced irrigation. Under  
23                  both irrigation regimes, SHS mulching suppressed evaporation and enhanced transpiration  
24                  by 78% and 17%, respectively relative to the bare soil. Overall, SHS mulching enhanced  
25                  root xylem vessel diameter, stomatal aperture, stomatal conductance, and chlorophyll  
26                  content index by 21%, 25%, 28%, and 23%, respectively. Total fruit yields, total dry mass,  
27                  and harvest index increased in SHS-mulched plants by 33%, 20%, and 16%, respectively  
28                  than in bare soil. These findings demonstrate the potential of SHS to boost irrigation  
29                  efficiency in water-limited environments and provide mechanistic insights behind yield  
30                  enhancement by SHS mulching.

31

32 **KEYWORDS:** evapotranspiration; *Solanum lycopersicum*; superhydrophobic sand;  
33 transpiration efficiency; chlorophyll content index; stomatal conductance; harvest index.

34

35

36 **INTRODUCTION**

37 Irrigated agricultural lands are of vital importance, as they represent 20% of the total  
38 cultivated land but contribute over 40% of the global food production (WWAP, 2009).

39 Irrigated agriculture has been expanding to feed the growing global population; for  
40 example, India, China, and Brazil have witnessed a 30% (Jain et al., 2020), 52% (Zhu et  
41 al., 2013), and 52% (Carvalho et al., 2020) increase in cultivated areas under irrigation in

42 the last 50 years, respectively. Further, between 2012 and 2030, the global irrigated land  
43 area is expected to increase by over  $\approx 30\%$ , from 310 Mha to 402 Mha (Darko et al., 2016).

44 These food production trends are sustainable only when freshwater is abundant. However,  
45 groundwater resources have been extensively exploited for irrigation in densely populated  
46 arid and semi-arid regions and are thus rapidly declining (Steward et al., 2013, Watto et  
47 al., 2018b, Watto et al., 2018a, Scanlon et al., 2012, Famiglietti, 2014). Therefore, water  
48 consumption patterns in irrigated agriculture must be studied, and new technologies must  
49 be created to achieve global water–food security.

50 Water applied to topsoil is lost via evaporation, transpiration, and percolation  
51 (Sutanto, 2012). High temperatures and dry winds in arid and semi-arid regions lead to  
52 substantial evaporative and transpiration losses (Al-Naizy, 2012, Balugani et al., 2017),  
53 whereas percolation is due to the poor water-holding capacity of sandy soils (Lehmann et  
54 al., 2019, Or and Lehmann, 2019). These water losses are compensated via irrigation that,  
55 due to the sheer size of agricultural operations, claims the lion’s share (approximately  
56  $\approx 80\%$ ) of global annual freshwater consumption (2500 km<sup>3</sup>/yr) (Shiklomanov, 2000,  
57 Hoekstra and Mekonnen, 2012). Whereas evaporation and percolation do not directly  
58 contribute to photosynthesis during plant growth, transpiration is crucial in maintaining the  
59 optimal temperature required for plants’ metabolic processes (Grill and Ziegler, 1998,  
60 Hetherington and Woodward, 2003). Transpiration thus cannot be reduced while high crop  
61 productivity is maintained without genetic engineering. Percolation could be reduced by  
62 applying a water barrier layer beneath the plant root zone, but this process is labor-intensive

63 and expensive (Nkurunziza et al., 2019). Thus, many researchers have focused on reducing  
64 evaporative losses.

65 Together, evaporation and transpiration constitute evapotranspiration (ET), a  
66 process that plays an important role in irrigation and agriculture practices (Hatfield and  
67 Dold, 2019, Rawitz and Hadas, 1994). The importance of transpiration is reflected in the  
68 water-use efficiency (WUE) of plants, i.e., the ratio of the total biomass (root and shoot)  
69 formed to the cumulative water transpired (Kadam et al., 2015), and the transpiration  
70 efficiency (TE), i.e., the ratio of the shoot biomass produced to the cumulative water  
71 transpired (Vadez et al., 2014). The TE represents an aspect of WUE that depends on the  
72 water-conducting (i.e., hydraulic) potential of a plant to facilitate shoots' physiological  
73 processes that enhance biomass under different soil water scenarios(Vadez et al., 2014).  
74 Therefore, the TE is of interest in water-scarce environments where crops are most  
75 sensitive to soil moisture (Condon et al., 2002, Sinclair, 2012). Transpiration also  
76 influences the plants' reproductive efficiency, defined by the harvest index (HI) entailing  
77 the ratio of total yield to total vegetative biomass produced, pinpointing the plant resources  
78 invested in yield production (Porker et al., 2020, Unkovich et al., 2010). Hence, whereas  
79 water uptake and efficient use of water are critical for plant growth and biomass  
80 accumulation, the development and growth of reproductive organs determines the HI,  
81 which is critical to crop yield (Hammer et al., 2021).

82 Notably, evaporation is a wasteful component of ET and should be minimized.  
83 Mulching, i.e., applying a vapor diffusion barrier on the topsoil to curtail water  
84 evaporation, has been proven to enhance soil moisture content and provide enhanced  
85 transpiration (Moitra, 1996, Zhang et al., 2018, Farzi et al., 2017), plant biomass, and yields  
86 (Ramalan, 2000, Zhang, 2017a, Mukherjee, 2010). Mulching has been demonstrated to  
87 enhance leaf chlorophyll content (Wang et al., 2015), photosynthesis (Niu et al., 2020,  
88 Zhang et al., 2019), and TE (Balwinder-Singh et al., 2011), as well as improve plant root  
89 growth and roots' architectural and anatomical properties, such as root diameter and late  
90 xylem vessel diameter, which improves water and nutrient uptake from the soil (Zhan et  
91 al., 2019, Larsson and Jensen, 1996). Low-density polyethylene sheets approximately 0.1  
92 mm thick have been used extensively for mulching in developed countries (Kasirajan and  
93 Ngouajio, 2012). Their application in the developing world is also on the rise, e.g.,

94 consumption in China is set to exceed two million tons per year by 2024 (Liu et al., 2014,  
95 Wang et al., 2013). Despite their benefits (Zhang, 2017b, Zhang et al., 2019, Balwinder-  
96 Singh et al., 2011, Yin W, 2019, Li, 2004), plastics are non-biodegradable, and their  
97 eventual disposal into landfills is unsustainable (Kasirajan and Ngouajio, 2012, Halley et  
98 al., 2001). Recent findings on the leaching of phthalates from plastic mulches into soils and  
99 their adverse effects on the soil quality and microbial activity over the long term are also  
100 concerning (Shah and Wu, 2020). Therefore, sustainable mulching technologies are  
101 needed.

102 We recently developed superhydrophobic sand (SHS) mulch technology (Mishra  
103 et al., 2017, Gallo Jr et al., 2021a), a nature-inspired material comprising common sand  
104 grains or sandy soils coated with a nanoscale layer of paraffin wax (wax to sand mass ratio  
105 is 1:1000). The micro- and nanoscale surface roughness of the sand grains/particles and the  
106 hydrophobic nature of wax induce superhydrophobicity (Arunachalam et al., 2019). When  
107 laid on topsoil with a sub-surface irrigation system, a 5–10 mm-thick SHS layer can  
108 insulate the wet soil from solar radiation and dry air, thereby acting as a diffusion barrier,  
109 which reduces evaporation (Gallo Jr et al., 2021b). Multi-year field trials of SHS on  
110 tomatoes (*Solanum lycopersicum*), wheat (*Triticum aestivum*), and barley (*Hordeum*  
111 *vulgare*) under naturally arid land conditions in Saudi Arabia have revealed significant  
112 enhancements in plant growth and yields (Gallo Jr et al., 2021a). Compared with plastic  
113 mulch, SHS is cheaper and more environmentally friendly, as it is made from readily  
114 abundant sands and paraffin wax that is easily degraded by soil microbes (Marino, 1998,  
115 Roper, 2004). After nine months of use, the wax is decomposed by microbial activity and  
116 solar radiation and incorporated into the soil after the crop cycle without affecting soil  
117 microbial compositions, obviating landfilling (Gallo Jr et al., 2021a). Despite these  
118 promising field results, quantitative insights into the effects of SHS on ET and the  
119 phenotypic traits responsible for yield enhancement are lacking.

120 This work therefore aims to quantify the effects of mulching with SHS on tomato  
121 plants by pinpointing the ET dynamics and consequent plant phenotypes, including plant  
122 height, stomatal conductance, stomatal pore size (aperture), leaf chlorophyll content, fruit  
123 yields, HI, TE, fresh mass, dry mass, xylem vessel and root diameter. These effects are

124 considered in plants grown in controlled growth chambers under normal (**N**) and reduced  
125 (**R**) irrigation scenarios at 100% field capacity and 50% of field capacity, respectively.

126

## 127 **MATERIALS AND METHODS**

### 128 **Plants and SHS mulch**

129 The tomato plants (*Solanum lycopersicum*), Seminis variety (St. Louis, Missouri, US),  
130 were purchased from local seed stores in Jeddah, Saudi Arabia. The SHS was produced  
131 from common sand and paraffin wax following the optimized protocol detailed in previous  
132 work (Mishra et al., 2017, Gallo Jr et al., 2021a); readers are referred to these works for  
133 details on SHS production. Briefly, sand was added to an organic solvent containing  
134 dissolved wax. The solvent was then removed by changing the pressure and temperature  
135 and condensed for reuse, leaving behind the SHS.

136

### 137 **Plant growth conditions, treatment, and experimental design**

138 The tomato seeds were sown in plastic trays using a potting mix from Stender AG  
139 (Schermbek, Germany) and grown in Percival growth chambers. After four weeks, the  
140 seedlings were transplanted into pots 1,870 cm<sup>3</sup> in volume (15 cm top diameter × 10.5 cm  
141 bottom diameter × 14.5 cm height) containing approximately 2.4 kg of local sandy soil.  
142 The pots were watered via sub-surface irrigation to two field capacity levels every two  
143 days: 100% field capacity for **N** irrigation (i.e., the maximum soil moisture content after  
144 drainage of excess water from fully saturated potted soil) and 50% of this field capacity for  
145 **R** irrigation. The irrigation level of each pot was determined gravimetrically. Thirty-two  
146 pots were prepared, including 16 with plants and 16 without plants, the latter of which were  
147 used to quantify evaporative losses.

148 The pots were separated into two groups: those comprising SHS and those  
149 containing only bare soil. In each group, half of the pots were subjected to **N** irrigation  
150 while the other half was maintained under **R** irrigation. For pots containing SHS, a 1.0 cm-  
151 thick layer of SHS was applied to the potting soil (approximately 265 g SHS/pot). Thus,  
152 there were four treatment combinations (SHS-**N**, bare soil-**N**, SHS-**R**, and bare soil-**R**),  
153 each with two replicates with and without plants. All pots were subjected to complete  
154 randomization in a 2 × 2 factorial design involving two experimental factors (i.e., soil

155 mulching and irrigation regime), each with two levels and four replicates. During the  
156 growth period, nutrient solutions were applied to each pot every two weeks comprising in  
157 rates per kg of dry soil: 200 mg N/kg, 250 mg P/kg, 200 mg K/kg, 150 mg Ca/kg, 30 mg  
158 S/kg, 2 mg Cu/kg, 4 mg Zn/kg, 3 mg Mn/kg, 0.5 mg B/kg, and 0.25 mg Mo/kg. The plants  
159 were grown for 98 days under a 14/10 h light/dark photoperiod using artificial fluorescent  
160 lighting at  $800 \mu\text{mol m}^{-2} \text{s}^{-1}$  of photosynthetically active radiation, a day/night temperature  
161 of  $28/20^\circ\text{C} \pm 2^\circ\text{C}$ , and  $60 \pm 2\%$  air relative humidity.

162

### 163 **Evapotranspiration (ET)**

164 The ET was partitioned into evaporation and transpiration by performing gravimetric  
165 measurements of pots every two days until the final harvest. The water loss from each pot  
166 was monitored, and water was added to compensate for the water lost. The daily ET was  
167 recorded as the total water lost from each pot containing plants between the time of  
168 irrigation to the time of weighing as:

169

$$170 \quad ET = (\text{Initial weight of pot with plant} - \text{final weight of pot with plant}) / (\text{time between} \\ 171 \quad \text{measurements}). \quad (\text{Eq. i})$$

172

### 173 **Evaporation**

174 Under the assumption that the pots with and without plants experienced a similar amount  
175 of evaporation, the daily water loss by evaporation was estimated using pots without plants  
176 as:

177

$$178 \quad \text{Evaporation} = (\text{Initial weight of pot without plant} - \text{final weight of pot without plant}) / (\text{time} \\ 179 \quad \text{between measurements}). \quad (\text{Eq. ii})$$

180

### 181 **Transpiration**

182 The daily transpiration was determined as:

183

$$184 \quad \text{Transpiration} = (ET - \text{Evaporation}). \quad (\text{Eq. iii})$$

185

186 **Soil water content (SWC)**

187 The total available soil water content (SWC; i.e., the field capacity) was maintained at a  
188 relatively constant level by compensating for the water lost through ET after each  
189 gravimetric measurement scheduled at two-day interval, as has been done by prior  
190 researchers (Ray and Sinclair, 1998, Pellegrino et al., 2004).

191

192 **Stomatal conductance and leaf chlorophyll content**

193 The leaf stomatal conductance was determined using an AP4 Porometer (Delta T,  
194 Cambridge, UK). Measurements were performed on three young but fully expanded leaves  
195 once a week (between 10:00 and 12:00), and the mean conductance for each treatment  
196 combination was calculated. The leaf chlorophyll content index (CCI) was measured using  
197 a CCM-200 Chlorophyll Content Meter (Optic-Sciences, Inc. Hudson NH03051, USA),  
198 with measurements being performed on three young but fully expanded leaves.

199

200 **Leaf stomatal pore and root anatomical features**

201 Microscopic analyses of leaf stomata and root anatomic structures were performed on  
202 samples collected on the final date of harvest. Two fully expanded upper leaves were cut  
203 from each plant (between 11:00 and 11:30) and immediately immersed in 70% ethanol  
204 inside 50 ml centrifuge tubes until they were analyzed. After two weeks, the preserved leaf  
205 tissues were washed with deionized water three times, added to 40 ml of concentrated  
206 sodium hypochlorite, and left to stay for approximately 4 hours. The leaf tissues were re-  
207 washed with deionized water, and fresh 70% ethanol was again added onto the samples.  
208 This clearing process removed the chlorophyll from the leaves and rendered them white in  
209 appearance. The stomata of the cleared leaves were then observed using a digital  
210 microscope (Leica DVM6) equipped with the tools to measure the length and width of the  
211 stomatal pores. The total stomatal aperture area was calculated using the formula for the  
212 area of an ellipse, as

213

214 
$$\text{Stomatal aperture area} = \pi \times a \times b, \quad (\text{Eq. iv})$$

215

216 where  $a$  and  $b$  represent the semi-major axis (or radius) and semi-minor axis (or width) of  
217 the ellipse, respectively.

218 Root samples 10 cm in length from the growing tip were cut using a razor, washed in  
219 deionized water, and fixed in 70% ethanol until their microscopic analysis. Two hand-cut  
220 root tissues were made per plant and their cross-sections were analyzed using the same  
221 digital microscope to measure diameter of the xylem vessels and the total root.

222

### 223 **Plant growth, fruit yield, and biomass**

224 The plant height was measured every week during the 98-day experimental period.  
225 Tomatoes were harvested and weighed at the time of harvest. During the final harvest, the  
226 shoots and roots of each plant were weighed, and then put in paper bags and oven-dried at  
227 105 °C for four days to determine their dry mass.

228

### 229 **Harvest index (HI) and transpiration efficiency (TE)**

230 After harvest, the HI was calculated for each plant as the ratio of total fruit yield (fruit mass  
231 per plant) to total fresh mass (shoot and roots) per plant, as:

232

$$233 \quad HI = \frac{\text{Total fruit yield}}{\text{Total fresh biomass}}. \quad (\text{Eq. v})$$

234

235 The TE of each plant was calculated as the ratio of dry shoot biomass in grams to the  
236 amount of water transpired in kilograms, as:

237

$$238 \quad TE = \frac{\text{Shoot dry biomass produced (g)}}{\text{mass of water transpired (kg)}}. \quad (\text{Eq. vi})$$

239

### 240 **Data analysis**

241 Data analysis and graphical presentations were performed using Origin Pro Software (2019  
242 version). A three-way analysis of variance (ANOVA) was used to analyze the effects of  
243 soil mulching, irrigation regimes, growth stage (i.e., time), and their interactions on ET.  
244 For the variables averaged across time (i.e., time-independent), a two-way factorial  
245 ANOVA was performed to determine the effects of soil mulching, irrigation regimes, and



246 their interactions. In each analysis, mean comparisons were done using the Tukey test at  
247 the  $p < 0.05$  level of statistical significance.

248

## 249 RESULTS

### 250 Plant growth

251 Representative snapshots of experimental plants grown under each condition (i.e., bare soil  
252 or soil containing SHS and N or R irrigation) at different weeks during their growth, from  
253 transplanting (week 0) to fruit ripening (week 12), are shown in **Fig. 1**. Overall, the plants  
254 grown in soils containing SHS were larger and appeared healthier than those grown in bare  
255 soil.

256

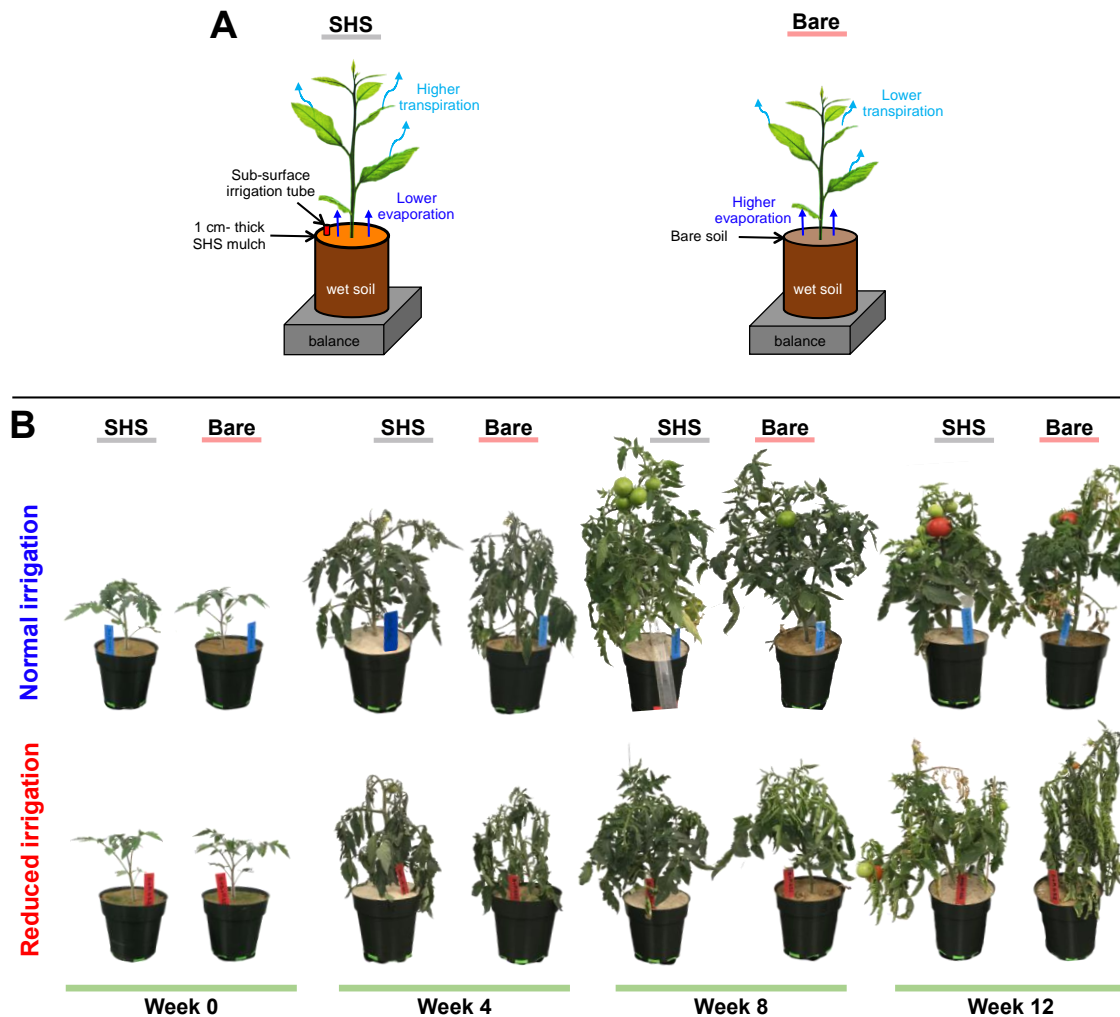

257

258

259 **Fig. 1. Effects of SHS mulching on plants.** (A) Schematics of the evaporation and transpiration pathways  
260 and their impacts on plants. (B) Representative photographs of tomato plants grown in controlled growth  
261 chambers mulched with 1-cm-thick superhydrophobic sand (SHS) and bare soil plants under normal (N) and  
262 reduced (R) irrigation. Tomato plants were transplanted and grown for 98 days until the final fruit and  
263 biomass harvest. Each treatment combination involved four ( $n = 4$ ) replicate plants.

264

### 265 **Soil water content**

266 The daily SWC corresponding to each irrigation level is detailed in **Fig. 2A**. For both N  
267 and R irrigation strategies (i.e., 100% and 50% field capacity, respectively), the SWC was  
268 slightly increased during days 40–98 to compensate for the increase in plant size and water  
269 demand. The slight fluctuations in SWC below the initial field capacities observed at five  
270 occasions (i.e., between 30–50 days) represent five days when pot weights were recorded  
271 without adding water until the following day due to unavoidable circumstances. However,  
272 the plants were not severely stressed on these occasions, as the available SWC was enough  
273 to meet the ET demand of the plants until the next day when water was added to the pots.  
274 When averaged across both mulched and bare soils, the mean SWC was  $0.62 \pm 0.01$  and  
275  $0.33 \pm 0.01$  kg/pot under N and R irrigation, respectively. This result also demonstrates  
276 that plant growth could be maintained under 50% of normal irrigation (i.e., the R irrigation  
277 strategy).

278

### 279 **Evapotranspiration**

280 The daily ET significantly differed between the N and R irrigation scenarios and accounted  
281 for approximately 50% of the daily SWC on average, as shown in **Fig. 2B**. Under R  
282 irrigation, ET differed between mulched and bare soils, notably during days 10–35 and 45–  
283 75; no significant differences were found under N irrigation.

284

### 285 **Soil evaporation and transpiration**

286 Throughout the growth period, the daily evaporation was significantly lower from soil  
287 containing SHS than bare soil under N and R irrigation, as shown in **Fig. 2C**. Consequently,  
288 plants in mulched soil had higher daily transpiration than in bare soil under both irrigation  
289 scenarios, as shown in **Fig. 2D**.

290

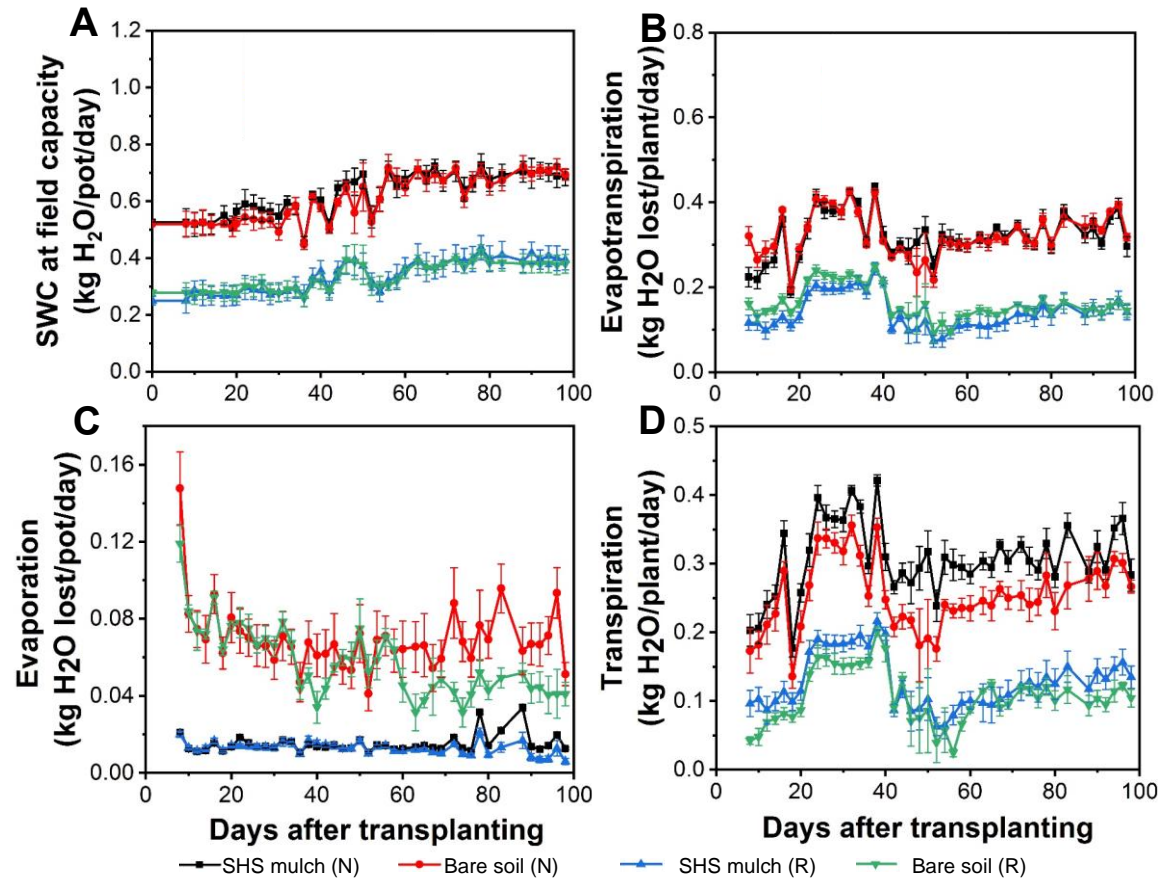

291

292

293 **Fig. 2.** (A) Soil water content (SWC) in pots maintained at field capacity for each treatment and irrigation  
294 regime, (B) daily changes in ET, (C) evaporation from the soil, and (D) transpiration between SHS-mulched  
295 and bare soils under N and R irrigation strategies throughout plant growth. Each data point is a mean of four  
296 ( $n = 4$ ) replicates; error bars are standard errors ( $\pm$ SE) of the means.

297

### 298 Cumulative evapotranspiration

299 There was no significant difference in the cumulative ET loss between mulched and bare  
300 soils under N irrigation; both had a mean cumulative ET of  $13.9 \pm 0.7$  kg/plant over the 98  
301 days of observation, as shown in **Fig. 3A**. Under R irrigation, the cumulative ET was 13%  
302 higher in SHS-mulched soil in than bare soils (with mean values of  $6.97 \pm 0.57$  and  $6.06 \pm$   
303  $0.78$  kg/plant, respectively).

304

305

306 **Cumulative soil evaporation and transpiration**

307 In SHS-mulched soils, that total cumulative evaporation (and transpiration) accounted for  
308 5% (95%) and 9% (91%) of the total ET under **N** and **R** irrigation, respectively; in bare  
309 soils, evaporation (and transpiration) accounted for 21.5% (78.5%) and 31.5% (65.5%) of  
310 the total ET under **N** and **R** irrigation, respectively (**Figs. 3B and 3C**). Overall, SHS  
311 mulching suppressed evaporation and enhanced transpiration by the same magnitude of  
312 78% and 17%, respectively under both **N** and **R** irrigation relative to the bare soils.

313

314 **Plant height**

315 Throughout the growth period, the maximum plant height in SHS-mulched soil  
316 significantly exceeded that in bare soil by 9% ( $p = 0.005$ ) and 11% ( $p < 0.05$ ) under **N** and  
317 **R** irrigation, respectively (**Fig. 3D**). In particular, a more rapid increase in the plant height  
318 was observed during 10–45 days after transplanting; after 70 days, plant height started to  
319 level off.

320

321 **Dependence of evapotranspiration on plant growth stage**

322 The daily mean ET, evaporation, and transpiration during days 0–30, 31–60, and 61–98  
323 are compiled in **Table 1**. Overall, the mean ET, evaporation, and transpiration increased  
324 with time; significant differences were present in the mean ET and transpiration between  
325 each timeframe ( $p < 0.05$ ). However, no significant difference was found in the mean  
326 evaporation from bare soil with time under **N** irrigation ( $p > 0.05$ ), as evidenced by the  
327 three-way ANOVA results. Significant two-way interactions were present between  
328 mulching and irrigation regimes on transpiration ( $p < 0.05$ ) and between irrigation regime  
329 and growth stage on ET, evaporation, and transpiration ( $p < 0.05$ ).

330

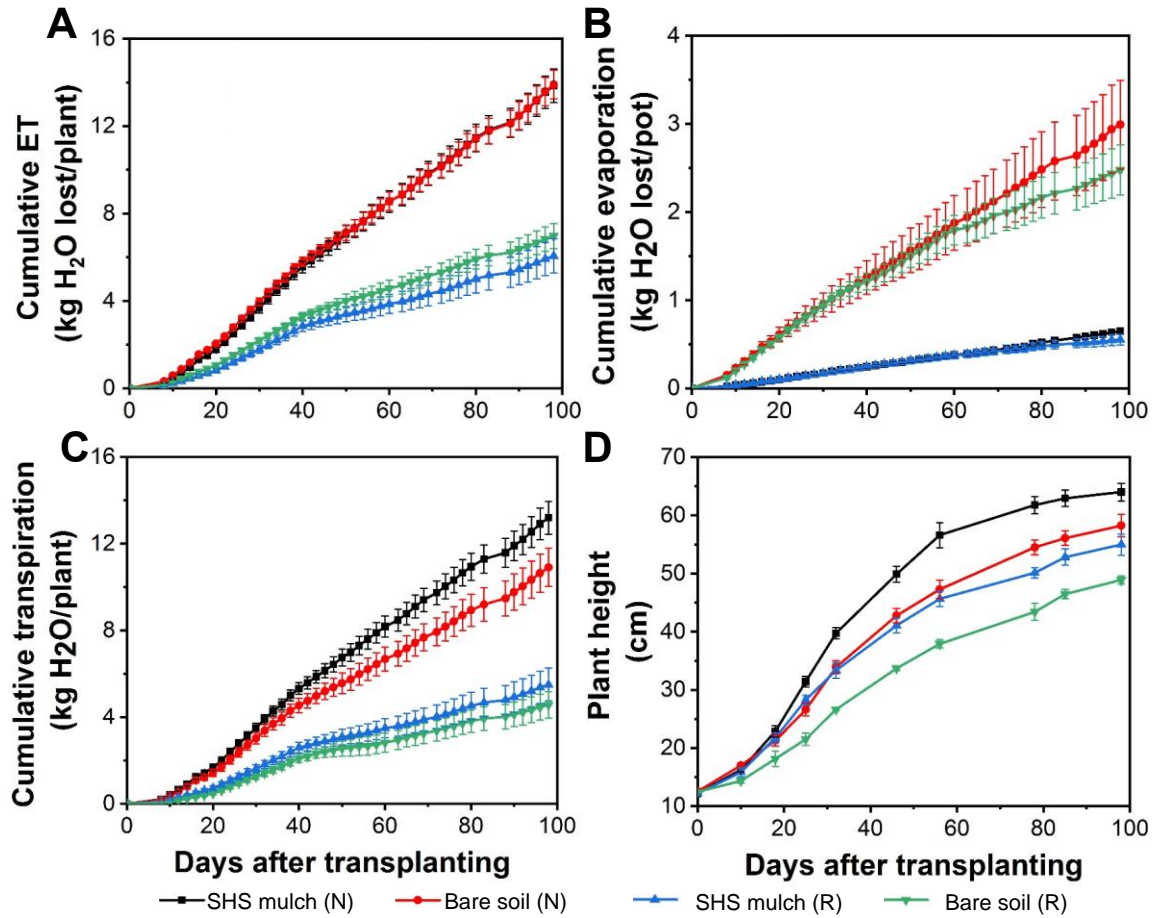

331

332

333 **Fig. 3.** (A) Cumulative evapotranspiration (ET), (B) evaporation, (C) transpiration, and (D) plant height  
334 during plant growth under contrasting soil mulching treatments (i.e., SHS-mulched vs. bare soil) and  
335 irrigation regimes (i.e., N and R). Each data point is a mean of four ( $n = 4$ ) replicates; error bars represent  
336 the  $\pm$ SE of the mean.

337 **Table 1. Effects of soil mulching (M), irrigation regimes (W), growth stage (S)– shown by the three different time periods, and**  
 338 **their interactions on mean evapotranspiration (ET), evaporation, and transpiration.**

| Treatments         | ET (kg/plant) |            |           | Evaporation (kg/pot) |            |            | Transpiration (kg/plant) |            |            |
|--------------------|---------------|------------|-----------|----------------------|------------|------------|--------------------------|------------|------------|
|                    | 0–30 days     | 31–60 days | 61–98days | 0–30 days            | 31–60 days | 61–98 days | 0–30 days                | 31–60 days | 61–98 days |
| SHS mulch (N)      | 3.66±0.14     | 4.89±0.21  | 5.29±0.22 | 0.19±0.02            | 0.21±0.01  | 0.27±0.01  | 3.48±0.13                | 4.68±0.20  | 5.02±0.22  |
| Bare soil (N)      | 3.93±0.14     | 4.59±0.16  | 5.34±0.15 | 0.93±0.11            | 0.93±0.16  | 1.12±0.18  | 3.00±0.21                | 3.66±0.20  | 4.23±0.30  |
| SHS mulch (R)      | 1.79±0.14     | 2.07±0.24  | 2.20±0.33 | 0.18±0.40            | 0.20±0.02  | 0.18±0.02  | 1.61±0.13                | 1.86±0.23  | 2.02±0.31  |
| Bare soil (R)      | 2.24±0.15     | 2.39±0.17  | 2.40±0.11 | 0.92±0.02            | 0.86±0.08  | 0.68±0.01  | 1.32±0.15                | 1.57±0.22  | 1.74±0.07  |
| <b>3-way ANOVA</b> | <b>ET</b>     |            |           | <b>Evaporation</b>   |            |            | <b>Transpiration</b>     |            |            |
| M (df =1)          | ns            |            |           | 266 (0.0*)           |            |            | 25.0 (0.0*)              |            |            |
| W (df =1)          | 702 (0.0*)    |            |           | 5.63 (0.02)          |            |            | 500 (0.0*)               |            |            |
| S (df = 2)         | 33.0 (0.0*)   |            |           | ns                   |            |            | 26.0 (0.0*)              |            |            |
| M×W (df = 1)       | ns            |            |           | ns                   |            |            | 5.28 (0.03)              |            |            |
| M×S (df = 2)       | ns            |            |           | ns                   |            |            | ns                       |            |            |
| W×S (df = 2)       | 15.0 (0.0*)   |            |           | 3.49 (0.04)          |            |            | 7.74 (0.0*)              |            |            |
| M×W×S (df = 2)     | ns            |            |           | ns                   |            |            | ns                       |            |            |

339 Data presented in the upper rows indicate mean values ( $\pm$ SE) of total ET, evaporation, and transpiration at three time periods (0–30, 31–60, and 61–98 days after  
 340 transplanting) for each treatment combination: SHS-mulched mulch under N irrigation (SHS mulch-N); bare soil under N irrigation (Bare soil-N); SHS-mulched  
 341 mulch under R irrigation (SHS mulch-R); and bare soil under R irrigation (Bare soil-R). The lower rows indicate three-way ANOVA statistics for the effects of  
 342 M, W, S, and their interactions on total ET, evaporation, and transpiration. Significant results are represented by *F* values followed by their respective *p* (*p*  
 343 < 0.05) in parentheses; ns = non-significant results; 0.0\* represents *p*-values < 0.001; df = degrees of freedom.

344 **Effects of SHS mulching on physiological traits, biomass yield, and fruit yield**

345 The performed two-way ANOVA demonstrated the significant effect of SHS mulching on  
 346 total evaporation and transpiration ( $p < 0.05$ ) but no significant effect of SHS mulching on  
 347 the total ET, as presented in **Table 2**. In addition to the changes in ET, evaporation,  
 348 transpiration, and plant height demonstrated in **Figs. 2–3**, SHS mulching impacted other  
 349 plant responses such as stomatal conductance and aperture, CCI, TE, fruit yields, HI, fresh  
 350 mass, dry mass, root xylem vessel, and total root diameter, as presented in **Figs. 4–7**.

351

352 **Table 2. Results of two-way ANOVA test showing effects of soil mulching (M),**  
 353 **irrigation regime (W), and their interactions (M × W) on plant traits measured.**

| Source of variation | df | Total ET   | Total evaporation | Total transpiration | Stomatal conductance | Chlorophyll content index, CCI |
|---------------------|----|------------|-------------------|---------------------|----------------------|--------------------------------|
| M                   | 1  | ns         | 92.7 (0.0*)       | 12.3 (0.0*)         | 17.5 (0.0*)          | 62.6 (0.0*)                    |
| W                   | 1  | 197 (0.0*) | ns                | 232 (0.0*)          | 23.5 (0.0*)          | 17.4 (0.0*)                    |
| M×W                 | 1  | ns         | ns                | ns                  | ns                   | ns                             |
| Error               |    | 0.002      | 0.196             | 0.849               | 15810                | 26.584                         |

  

| Source of variation | df | Plant height | Shoot fresh mass | Root fresh mass | Total fresh mass | Shoot dry mass |
|---------------------|----|--------------|------------------|-----------------|------------------|----------------|
| M                   | 1  | 11.7 (0.01)  | 51.4 (0.0*)      | 15.8 (0.0*)     | 53.2 (0.0*)      | 21.5 (0.0*)    |
| W                   | 1  | 43.4 (0.0*)  | 89.9 (0.0*)      | 29.9 (0.0*)     | 111 (0.0*)       | 80.3 (0.0*)    |
| M×W                 | 1  | ns           | 12.5 (0.0*)      | ns              | 11.2 (0.0*)      | 7.65 (0.02)    |
| Error               |    | 6.468        | 103.310          | 5.971           | 114.8            | 5.619          |

  

| Source of variation | df | Root dry mass | Total dry mass | Transpiration efficiency, TE | Fruit yields per plant | Harvest Index, HI |
|---------------------|----|---------------|----------------|------------------------------|------------------------|-------------------|
| M                   | 1  | 20.6 (0.0*)   | 14.1 (0.0*)    | ns                           | 6.19 (0.03)            | 15.6 (0.0*)       |
| W                   | 1  | ns            | 36.2 (0.0*)    | 45.1 (0.0*)                  | 23.3 (0.0*)            | 12.2 (0.0*)       |
| M×W                 | 1  | ns            | ns             | ns                           | ns                     | ns                |
| Error               |    | 0.792         | 10.518         | 0.1326                       | 1541                   | 0.004             |

354 Data presented are *F* values from two-way ANOVA and p-values for significant results ( $p < 0.05$ ) in  
 355 parentheses; ns = non-significant results. 0.0\* represents  $p$ -values  $< 0.001$ ; df = degrees of freedom.

356

357

358 **Main effects of soil mulching and irrigation regimes**

359 A 27.7% higher stomatal conductance was present in SHS-mulched plants than those in  
360 bare soil across irrigation regimes ( $p = 0.001$ ; **Fig. 4A-i**). Stomatal conductance was also  
361 31.4% higher under **N** irrigation than under **R** irrigation ( $p < 0.05$ ; **Fig. 4A-ii**). Similarly,  
362 leaf CCI was 22.8% higher in SHS-mulched plants than those in bare soil ( $p < 0.05$ ; **Fig.**  
363 **4B-i**). Irrespective of mulch treatment, leaf CCI was 12.7% higher under **N** irrigation than  
364 **R** irrigation ( $p = 0.001$ ; **Fig. 4B-ii**). Fruit yield, defined by the total fruit mass per plant,  
365 was 32.8% higher in mulched soil than bare soil ( $p = 0.03$ ; **Fig. 4C-i**) and 55% higher  
366 under **N** irrigation than **R** irrigation ( $p < 0.05$ ; **Fig. 4C-ii**).

367 The relationship between fruit yield and total fresh mass (i.e., the HI) was  
368 characterized by 16% higher HI in mulched soil than bare soil ( $p = 0.002$ ; **Fig. 4D-i**).  
369 Regardless of the mulch treatment, using **R** irrigation decreased the HI by 14% ( $p = 0.004$ ;  
370 **Fig. 4D-ii**). No significant difference in the ratio of shoot dry mass to total water transpired  
371 per plant (i.e., the TE) was present between plants grown in mulched and bare soils ( $p =$   
372  $0.697$ ; **Fig. 4E-i**). However, the TE was 51.4% lower under **N** irrigation than **R** irrigation  
373 ( $p < 0.05$ ; **Fig. 4E-ii**).

374 In terms of biomass allocation, plants in mulched soil had 21% more root fresh  
375 mass than those in bare soil ( $p = 0.002$ ; **Fig. 4F-i**); plants under **N** irrigation had 28% more  
376 root fresh mass than their **R** irrigation counterparts ( $p < 0.05$ ; **Fig. 4F-ii**). The root dry mass  
377 was 33.5% higher in mulched soil than bare soil ( $p < 0.05$ ; **Fig. 4G-i**), while it was 14%  
378 higher under **N** irrigation than **R** irrigation ( $p = 0.046$ ; **Fig. 4G-ii**). The total dry mass in  
379 mulched soil increased by 20% over that in bare soil ( $p = 0.003$ ; **Fig. 4H-i**), while **N**  
380 irrigation resulted in 30% higher total dry mass than under **R** irrigation ( $p < 0.05$ ; **Fig. 4H-**  
381 **ii**).

382



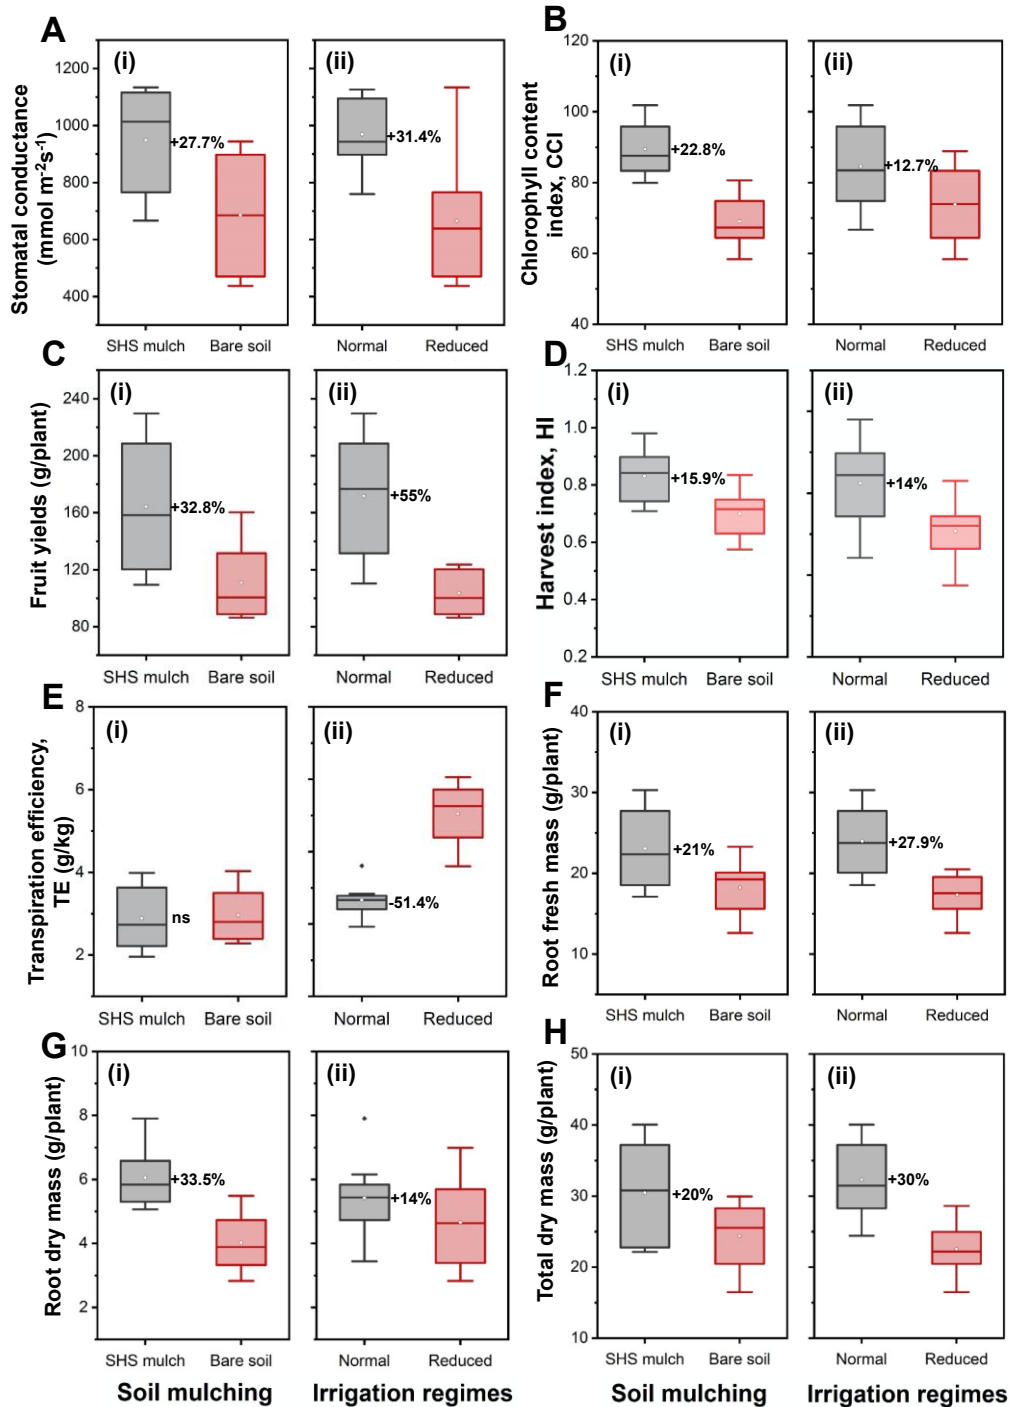

383

384

385 **Fig. 4.** ANOVA results showing effects of (i) soil mulching (SHS mulch vs. bare soil) and (ii) irrigation

386 regimes (N vs. R) on (A) leaf stomatal conductance; (B) CCI; (C) fruit yields per plant; (D) HI; (E) TE; (F)

387 root fresh mass; (G) root dry mass; and (H) total dry mass per plant. Each box represents the data distribution

388 from eight plants ( $n = 8$ ) with the median along the mid-line. The white dot inside the box represents the

389 mean value, the upper and lower sections of the box represent the 25% and 75% confidence intervals,

390 respectively, the whiskers on the box represent the 1.5 interquartile range, and dots outside the box indicate  
391 outliers. ns: no significant difference between treatments.

392

### 393 **Interaction effects of mulching and irrigation regimes**

394 There was also a significant interaction effect of mulching and irrigation on shoot fresh  
395 mass, shoot dry mass, and total fresh mass per plant. The shoot fresh mass was 26.6%  
396 higher in mulched soil than bare soil under **N** irrigation, whereas under **R** irrigation, the  
397 shoot fresh mass was 13% higher in mulched soil than bare soil (**Fig. 5A**;  $p < 0.05$ ,  $p =$   
398  $0.019$ , respectively). The shoot dry mass increased in mulched soil by 27% compared with  
399 that in bare soil under **N** irrigation; under **R** irrigation, shoot dry mass was 12% higher in  
400 mulched soil than bare soil (**Fig. 5B**;  $p = 0.001$ ,  $p = 0.046$ , respectively). Under **N**  
401 irrigation, SHS mulching increased the total fresh mass per plant by 26.5%; under **R**  
402 irrigation, the total fresh mass per plant was 13.5% higher in mulched soil than bare soil  
403 (**Fig. 5C**;  $p < 0.05$ ,  $p = 0.037$ , respectively).

404

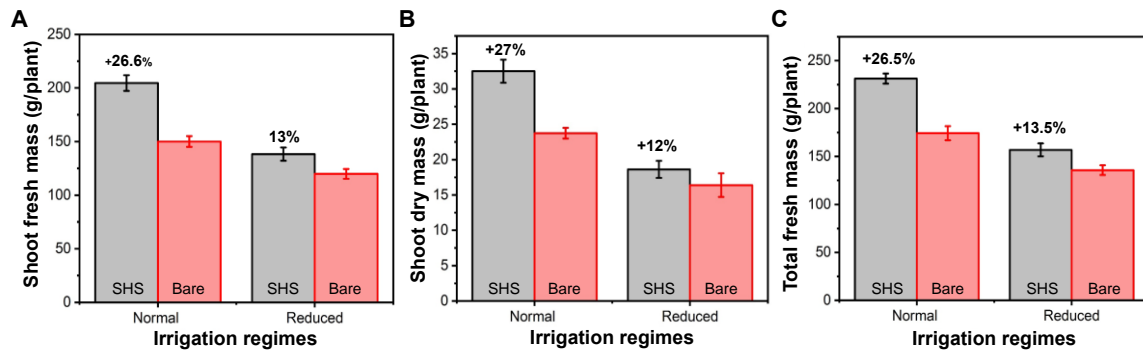

405

406

407 **Fig. 5.** Two-way interaction effects of soil mulching (SHS vs. bare soil) and irrigation regimes (**N** vs. **R**) on  
408 (A) shoot fresh mass, (B) shoot dry mass, and (C) total fresh mass per plant. Each bar represents the mean  
409 value of four replicates ( $n = 4$ ), and each error bar represents the SE of the means of four samples.

410

### 411 **Leaf stomatal status**

412 Microscopy revealed that the stomatal pores of plants grown in mulched soils (**Fig. 6A-i**  
413 **& iii**) were larger than those in bare soils (**Fig. 6A-ii & iv**); the mean stomatal aperture  
414 (area) was 25% larger regardless of the irrigation regime ( $p = 0.0019$ ; **Fig. 6B-i**).

415 Furthermore, the mean stomatal aperture was 34.6% higher under **N** irrigation than **R**  
416 irrigation ( $p < 0.05$ ; **Fig. 6B-ii**).

417

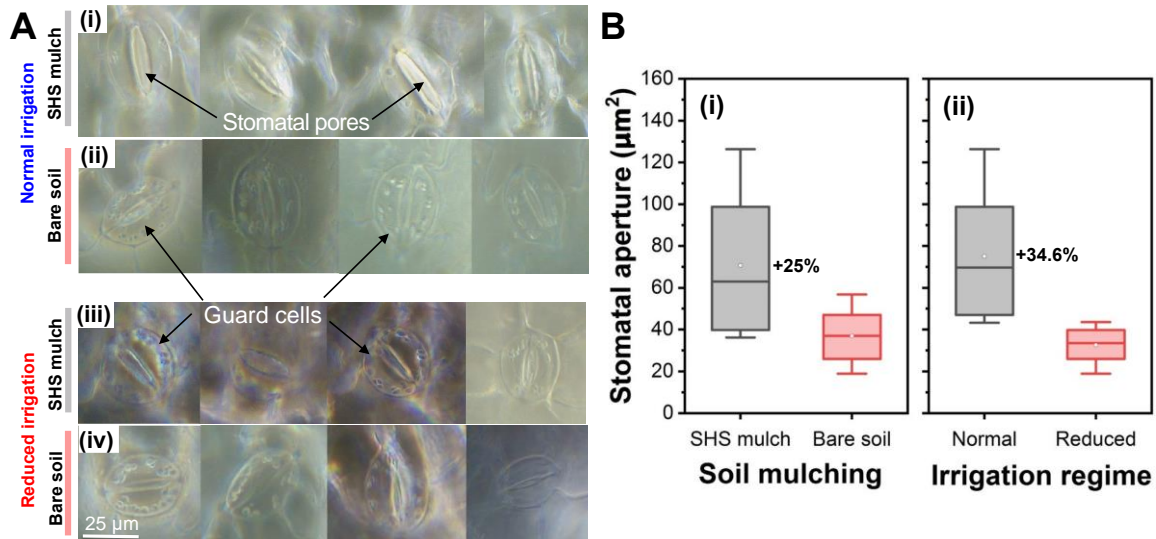

418

419

420 **Fig. 6.** Microscopic analysis of leaf stomatal pores in response to soil mulching and irrigation regimes as on  
421 the final date of plant harvest. **(A)** Leica DVM6 microscopic image of leaf stomata for plants grown under **N**  
422 and **R** irrigation in **(i, iii)** SHS-mulched and **(ii, iv)** bare soils. **(B)** Boxplots showing the mean stomatal  
423 aperture (area) for plants grown in **(i)** SHS and bare soil, and **(ii)** under **N** and **R** irrigation. Each box  
424 represents the data distribution from 16 leaf samples ( $n = 16$ ) with the median along the mid-line. The white  
425 dot inside the box represents the mean value, the upper and lower sections of the box represent the 25% and  
426 75% confidence intervals, respectively, and the whiskers on the box represent the 1.5 interquartile range.

427

## 428 **Root anatomical structure**

429 Finally, root anatomical features were measured to determine the shoot–root feedback  
430 linkages with the observed trends in ET as a function of mulching and irrigation scenarios;  
431 these results are summarized in **Figs. 7A-i–7A-iv**. The xylem vessel diameter was 21%  
432 larger for roots grown in mulched soil than bare soil ( $p = 0.001$ ; **Fig. 7B-i**). However, the  
433 difference in diameter under differing irrigation scenarios was not statistically significant  
434 ( $p = 0.343$ ; **Fig. 7B-ii**). Additionally, the root diameter increased in mulched soil by 28%  
435 relative to bare soil ( $p = 0.0177$ ; **Fig. 7C-i**), whereas it decreased from **R** irrigation to **N**  
436 irrigation by 20% ( $p = 0.0067$ ; **Fig. 7C-ii**).

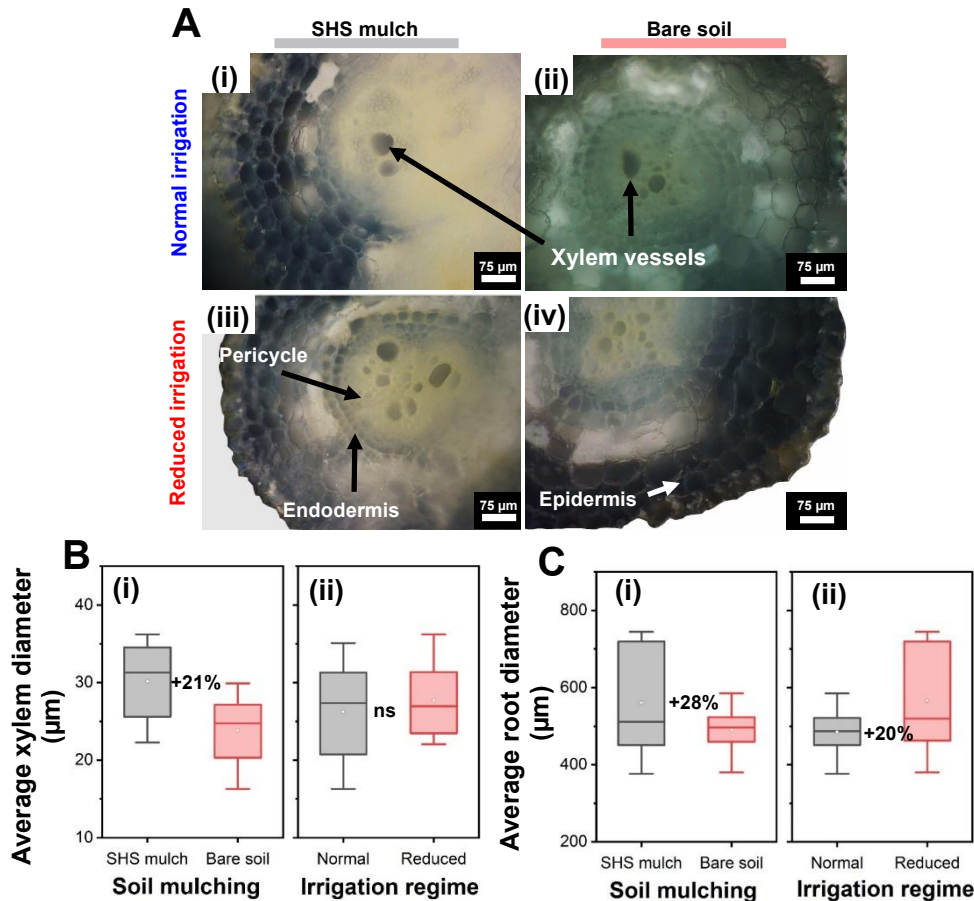

437

438

439 **Fig. 7.** (A, i-iv) Cross-sections of tomato roots from contrasting soil mulching and irrigation scenarios. (B-

440 C) Box plots showing the effects of (i) SHS mulching and (ii) irrigation regimes on (B) average xylem vessel

441 diameter and (C) average root diameter. Each box represents the data distribution from 16 root samples ( $n =$

442 16) with the median along the mid-line. The white dot inside the box represents the mean value, the upper

443 and lower sections of the box represent the 25% and 75% confidence intervals, respectively, the whiskers on

444 the box represent the 1.5 interquartile range, and dots outside the box indicate outliers. ns: no significant

445 difference between treatments.

446

## 447 DISCUSSION

448 To clarify the effects of SHS mulching presented on ET fluxes and phenotypic traits of

449 tomato plants grown under N and R irrigation, the mechanistic insights behind SHS

450 mulching and their various impacts on plants and interrelationships are analyzed in this

451 section. The physical mechanism behind the ability of SHS to reduce evaporation from soil

452 is based on the Laplace pressure (i.e., the pressure difference across a curved liquid

453 surface), which depends on the surface tension of water and the curvature of the liquid–air  
454 interface (Domingues et al., 2018, Das et al., 2019, Gallo Jr et al., 2021a). When water is  
455 supplied through sub-surface irrigation, it rises upward through the soil by capillarity and  
456 contacts the SHS layer on the topsoil. The curvature of the air–water interface touching the  
457 SHS grains forms a convex shape; the capillary action that drives the rise of water in soils  
458 prevents it from wetting the SHS layer, creating a diffusion barrier (Gallo Jr et al., 2021a,  
459 Gallo Jr et al., 2021b). By physically covering the topsoil, the mulch also insulates the soil  
460 from solar radiation and wind, thereby further reducing the capacity for evaporation losses  
461 (Kader et al., 2017, Gallo Jr et al., 2021a). With less evaporation, the soil moisture content  
462 rises, allowing for higher plant transpiration.

463 A significant causal relationship was present between the stomatal conductance and  
464 aperture (**Fig. 8A**) and between transpiration and stomatal conductance (**Fig. 8B**), total  
465 fresh mass (**Fig. 8C**), total dry mass (**Fig. 8D**), and fruit yield (**Fig. 8E**). These relationships  
466 suggest that the soil moisture-retaining function of SHS augments a chain of plant-related  
467 responses that affect stomatal opening and closure, which directly influence transpiration  
468 rates. Plants can alter their stomatal pore aperture by actively adjusting the turgor pressure  
469 within their guard cells (Blatt, 2000), which moderates the exchange of gases such as water  
470 vapor, carbon dioxide (CO<sub>2</sub>), and oxygen between the leaf interior and the atmosphere  
471 (Kollist et al., 2014, Lawson and Vialet-Chabrand, 2019, Franks and Farquhar, 2007).  
472 Enhanced water availability in the soil increases the guard cell turgor pressure, leading to  
473 a larger stomatal aperture and increased stomatal conductance of water vapor, which  
474 enhances the transpiration and CO<sub>2</sub> uptake rates for photosynthesis (Bertolino et al., 2019,  
475 Condon et al., 2002, Putra et al., 2012). This rationale underpins the observed increase in  
476 transpiration (**Figs. 2–3; Table 1**), stomatal conductance (**Fig. 4A**), and stomatal aperture  
477 (**Fig. 6**) when using SHS mulch.

478

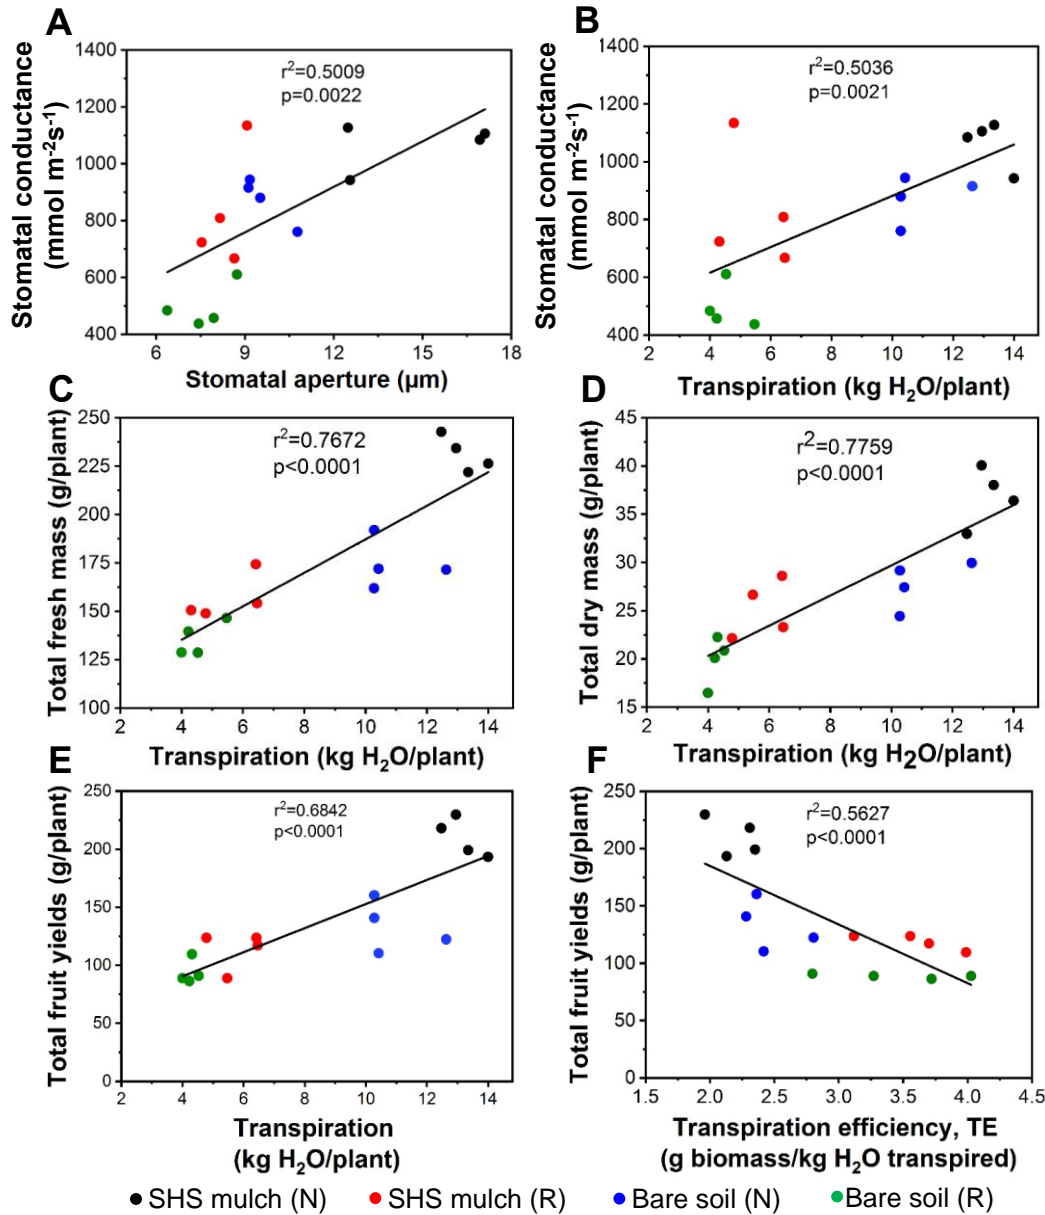

479

480 **Fig. 8.** Regression analyses showing the relationship between (A) leaf stomatal conductance and stomatal  
 481 aperture, (B) stomatal conductance and total transpiration, (C) total fresh mass and total transpiration, (D)  
 482 total dry mass and total transpiration, (E) total fruit yield per plant and total transpiration, and (F) total fruit  
 483 yield per plant and TE. Each dot on the graph indicates an individual plant grown in SHS mulch or bare soil  
 484 under N or R irrigation.

485

486 Aboveground physiological processes, including stomatal responses, are governed  
 487 by a feedback mechanism linked closely with the hydraulic conductivity of the soil water

488 in the root zone (Putra et al., 2012, Tardieu and Parent, 2017, Zarebanadkouki et al., 2016,  
489 Bertolino et al., 2019, Adachi et al., 2010, Chaves et al., 2002). This hydraulic conductivity  
490 is dependent on the diameter of the roots and the xylem vessels (Niklas, 1985, Comas et  
491 al., 2013). Here, larger xylem vessel and root diameters were present in mulched soil than  
492 in bare soil (**Fig. 7**). Consistent with these findings, larger xylem vessel and root diameters  
493 have been shown to develop in wheat plants in response to increased SWC caused by  
494 mulching (Zhan et al., 2019), increasing WUE and shoot biomass (Kadam et al., 2015).  
495 Although small-diameter roots maintain plant growth during a drought, especially at soil  
496 depths with available water (Comas et al., 2013), several researchers have suggested that  
497 large-diameter roots are more instrumental in resource uptake and plant growth under water  
498 scarcity (Larson and Funk, 2016, Kadam et al., 2015). The latter agrees with the observed  
499 results; the roots had a larger average diameter under **R** irrigation than **N** irrigation. A larger  
500 diameter may promote root penetrative ability or soil exploration in dry soils (Clark et al.,  
501 2003) and enhance root longevity (McCormack et al., 2012). These results indicate the  
502 important role that root architecture plays in resource acquisition and conservation to  
503 facilitate aboveground processes that determine productivity in plants.

504 The root–shoot hydraulic system conducts nutrients and water via the transpiration  
505 stream to the leaves; these nutrients (e.g., nitrogen) support plant growth and the  
506 photosynthetic process. Nitrogen availability is related to the total chlorophyll content in  
507 plant leaves (Bassi et al., 2018). The higher the chlorophyll content, the more efficient its  
508 photosynthetic capacity is, causing increased growth, yields, and biomass (Condon et al.,  
509 2004, Haeferle et al., 2009). Here, a higher CCI and higher transpiration due to SHS  
510 mulching contributed to higher fruit yield and biomass production, leading to a higher HI.  
511 The fruit mass per plant was negatively correlated with TE (**Fig. 8F**), indicating that fruit  
512 yields increased under low TE. This finding contradicts the proposal that higher TE is  
513 critical in increasing crop yields in water-limited environments (Christy et al., 2018,  
514 Sinclair, 2012, Rebetzke et al., 2002, Coupel-Ledru et al., 2016, Condon et al., 2004, Vadez  
515 and Ratnakumar, 2016). However, TE is a physiologically complex trait that results from  
516 a combination of multiple physiological parameters, such as photosynthesis, stomatal  
517 conductance, mesophyll conductance (i.e., the diffusion of CO<sub>2</sub> from sub-stomatal cavities  
518 to the sites of carboxylation in the chloroplasts) (Flexas and Medrano, 2002, Flexas et al.,

519 2008), and other conditions that determine carbon balance and growth in plants (Natarajan  
520 et al., 2021). Consequently, the conditions responsible for the expression of high TE in one  
521 situation may be associated with a low TE in another environment (Sinclair, 2012).

522 A prolonged stomatal opening and higher stomatal conductance account for lower  
523 TE (Flexas et al., 2008); mulched soils retain more SWC and maintain stomatal openings  
524 longer than bare soils, leading to a low TE (Balwinder-Singh et al., 2011). However, no  
525 significant difference in TE was present between SHS-mulched and bare soils, despite their  
526 difference in stomatal conductance. However, lower stomatal conductance was associated  
527 with higher TE under **R** irrigation than under **N** irrigation. These findings indicate the trade-  
528 off required between stomatal conductance and carboxylation efficiency to improve TE  
529 and yields. Unlike increasing the stomatal conductance, increasing the mesophyll  
530 conductance increases photosynthesis and TE without increasing transpiration because the  
531 CO<sub>2</sub> diffusion pathway involving mesophyll conductance is not shared with that of  
532 transpired water (Flexas et al., 2008, Ouyang et al., 2017, Flexas et al., 2013, Barbour et  
533 al., 2010).

534 Future investigations are needed to examine physiological traits associated with  
535 enhanced TE under different environmental conditions. For example, experiments  
536 resolving instantaneous leaf gas exchange could help determine photosynthesis and  
537 conductance (stomatal vs. mesophyll conductance), whereas measurements of carbon  
538 isotope composition ( $\delta^{13}\text{C}$ ; a surrogate trait that integrates TE and variation in root traits  
539 and plasticity) could enhance understanding of how aboveground and belowground  
540 processes shape plant responses and yield performance under different water regimes.  
541 Determining the genetic factors that can maximize transpiration and carbon assimilation to  
542 enhance photosynthetic output would complement the water-saving benefit of SHS  
543 mulching to improve yields in arid land agriculture.

544

## 545 **CONCLUSIONS**

546 In conclusion, by combining a broad set of techniques to investigate the effects of SHS  
547 mulching on ET fluxes and plant responses, this study revealed that adding a thin (1.0-cm  
548 thick) layer of SHS dramatically decreased water evaporation from the topsoil, thereby  
549 boosting transpiration under both irrigation scenarios studied. The enhanced transpiration,



550 in turn, increased plant biomass and fruit yield. Furthermore, this study facilitated  
551 understanding the mechanistic insights behind increased transpiration, biomass, and fruit  
552 yield owing to the root–shoot hydraulic processes accounting for enhanced water uptake  
553 and stomatal regulation. The quantitative assessment of ET, evaporation, and transpiration  
554 presented here will aid crop WUE assessments and field water optimization and  
555 management using SHS mulching, irrigation systems design, and agricultural regimes in  
556 arid and semi-arid regions.

557

## 558 **ACKNOWLEDGMENTS**

559 The co-authors would like to thank the assistance of the following staff of KAUST Plant  
560 Growth Core Labs Facilities: Dr. Richard Soppe, Dr. Muppala, and Mr. John E. Rahmer.

561

## 562 **FUNDING**

563 This research was supported by funding from King Abdullah University of Science and  
564 Technology under the award number **BAS/1/1070-01-01**.

565

## 566 **AUTHOR CONTRIBUTIONS**

567 **KO:** Designed and performed the experiments, including soil preparation, planting,  
568 harvests, data collection, and analysis; manuscript writing and revision. **AGJ:** Assisted  
569 with the experimental design, data analysis, and manuscript revision. **VD:** Collected the  
570 evapotranspiration data and assisted in plant harvest and biomass determination. **HM:**  
571 Supervised this research and revised the manuscript.

572

## 573 **DATA AVAILABILITY STATEMENT**

574 All data supporting the findings reported in this study are available in the paper. **HM** and  
575 **AGJ** have filed a US patent (US20200253138A1) for the SHS used in this work, while  
576 **KO** and **VD** have no competing financial interest in this work.

577

578 **ORCID:** Himanshu Mishra (<https://orcid.org/0000-0001-8759-7812>)

## **REFERENCES**

- Adachi, S., Tsuru, Y., Kondo, M., Yamamoto, T., Arai-Sanoh, Y., Ando, T., Ookawa, T., Yano, M. & Hirasawa, T. 2010. Characterization of a rice variety with high hydraulic conductance and identification of the chromosome region responsible using chromosome segment substitution lines. *Annals of Botany*, 106, 803-11.
- Al-Naizy, R., Simonet, D. 2012. Analysis of Water Evaporation and Drift Losses During Irrigation in Semi-arid Areas of Sharjah (UAE) and Riyadh (KSA). *Natural Resources Research*, 21, 285-299.
- Arunachalam, S., Das, R., Nauruzbayeva, J., Domingues, E. M. & Mishra, H. 2019. Assessing omniphobicity by immersion. *Journal of Colloid and Interface Science*, 534, 156-162.
- Balugani, E., Lubczynski, M. W., Reyes-Acosta, L., Van Der Tol, C., Frances, A. P. & Metselaar, K. 2017. Groundwater and unsaturated zone evaporation and transpiration in a semi-arid open woodland. *Journal of Hydrology*, 547, 54-66.
- Balwinder-Singh, Eberbach, P. L., Humphreys, E. & Kukal, S. S. 2011. The effect of rice straw mulch on evapotranspiration, transpiration and soil evaporation of irrigated wheat in Punjab, India. *Agricultural Water Management*, 98, 1847-1855.
- Barbour, M. M., Warren, C. R., Farquhar, G. D., Forrester, G. & Brown, H. 2010. Variability in mesophyll conductance between barley genotypes, and effects on transpiration efficiency and carbon isotope discrimination. *Plant, Cell & Environment*, 33, 1176-1185.
- Bassi, D., Menossi, M. & Mattiello, L. 2018. Nitrogen supply influences photosynthesis establishment along the sugarcane leaf. *Scientific Reports*, 8.
- Bertolino, L. T., Caine, R. S. & Gray, J. E. 2019. Impact of Stomatal Density and Morphology on Water-Use Efficiency in a Changing World. *Frontiers in Plant Science*, 10.
- Blatt, M. R. 2000. Cellular signaling and volume control in stomatal movements in plants. *Annual review of cell and developmental biology*, 16, 221-241.
- Carvalho, D., Martins, R., Santos, J., Teles, G., Gentile, M. & Oliveira, M. 2020. Evolution and current scenario of irrigated area in Brazil: Systematic data analysis. *Revista Brasileira de Engenharia Agrícola e Ambiental*, 24, 505-511.
- Chaves, M. M., Pereira, J. S., Maroco, J., Rodrigues, M. L., Ricardo, C. P. P., Osorio, M. L., Carvalho, I., Faria, T. & Pinheiro, C. 2002. How plants cope with water stress in the field. Photosynthesis and growth. *Annals of Botany*, 89, 907-916.
- Christy, B., Tausz-Posch, S., Tausz, M., Richards, R., Rebetzke, G., Condon, A., Mclean, T., Fitzgerald, G., Bourgault, M. & O'leary, G. 2018. Benefits of increasing transpiration efficiency in wheat under elevated CO<sub>2</sub> for rainfed regions. *Global Change Biology*, 24, 1965-1977.
- Clark, L., Whalley, W. & Barraclough, P. 2003. How do roots penetrate strong soil? *Roots: The Dynamic Interface Between Plants and the Earth*. Springer.

- Comas, L. H., Becker, S. R., Cruz, V. V., Byrne, P. F. & Dierig, D. A. 2013. Root traits contributing to plant productivity under drought. *Frontiers in Plant Science*, 4.
- Condon, A. G., Richards, R. A., Rebetzke, G. J. & Farquhar, G. D. 2002. Improving Intrinsic Water-Use Efficiency and Crop Yield. *Crop Science*, 42, 122-131.
- Condon, A. G., Richards, R. A., Rebetzke, G. J. & Farquhar, G. D. 2004. Breeding for high water-use efficiency. *Journal of Experimental Botany*, 55, 2447-2460.
- Coupel-Ledru, A., Lebon, E., Christophe, A., Gallo, A., Gago, P., Pantin, F., Doligez, A. & Simonneau, T. 2016. Reduced nighttime transpiration is a relevant breeding target for high water-use efficiency in grapevine. *Proceedings of the National Academy of Sciences*, 113, 8963-8968.
- Darko, R. O., Yuan, S., Hong, L., Liu, J. & Yan, H. 2016. Irrigation, a productive tool for food security – a review. *Acta Agriculturae Scandinavica, Section B — Soil & Plant Science*, 66, 191-206.
- Das, R., Arunachalam, S., Ahmad, Z., Manalastas, E. & Mishra, H. 2019. Bio-inspired gas-entrapping membranes (GEMs) derived from common water-wet materials for green desalination. *Journal of Membrane Science*, 588, 117185.
- Domingues, E. M., Arunachalam, S., Nauruzbayeva, J. & Mishra, H. 2018. Biomimetic coating-free surfaces for long-term entrapment of air under wetting liquids. *Nature Communications*, 9, 3606.
- Famiglietti, J. S. 2014. The global groundwater crisis. *Nature Climate Change*, 4, 945-948.
- Farzi, R., Gholami, M., Baninasab, B. & Gheysari, M. 2017. Evaluation of different mulch materials for reducing soil surface evaporation in semi-arid region. *Soil Use and Management*, 33, 120-128.
- Flexas, J. & Medrano, H. 2002. Drought-inhibition of photosynthesis in C3 plants: stomatal and non-stomatal limitations revisited. *Annals of botany*, 89, 183-189.
- Flexas, J., Niinemets, Ü., Gallé, A., Barbour, M. M., Centritto, M., Diaz-Espejo, A., Douthe, C., Galmés, J., Ribas-Carbo, M. & Rodriguez, P. L. 2013. Diffusional conductances to CO<sub>2</sub> as a target for increasing photosynthesis and photosynthetic water-use efficiency. *Photosynthesis Research*, 117, 45-59.
- Flexas, J., Ribas-Carbo, M., Diaz-Espejo, A., Galmes, J. & Medrano, H. 2008. Mesophyll conductance to CO<sub>2</sub>: current knowledge and future prospects. *Plant, Cell & Environment*, 31, 602-21.
- Franks, P. J. & Farquhar, G. D. 2007. The mechanical diversity of stomata and its significance in gas-exchange control. *Plant Physiology*, 143, 78-87.
- Gallo Jr, A., Odokonyero, K., Mousa, M. A., Reihmer, J., Al-Mashharawi, S., Marasco, R., Manalastas, E., Morton, M. J., Daffonchio, D., McCabe, M. F. & Mishra, H. 2021a. Superhydrophobic sand mulches increase agricultural productivity in arid regions. *arXiv e-prints*, arXiv: 2102.00495. [Preprint].

- Gallo Jr, A., Tavares, F., Das, R. & Mishra, H. 2021b. How particle–particle and liquid–particle interactions govern the fate of evaporating liquid marbles. *Soft Matter* (DOI: 10.1039/D1SM00750E).
- Grill, E. & Ziegler, H. 1998. A plant's dilemma. *Science*, 282, 252-253.
- Haefele, S. M., Siopongco, J. D. L. C., Boling, A. A., Bouman, B. A. M. & Tuong, T. P. 2009. Transpiration efficiency of rice (*Oryza sativa* L.). *Field Crops Research*, 111, 1-10.
- Halley, P., Rutgers, R., Coombs, S., Kettels, J., Gralton, J., Christie, G., Jenkins, M., Beh, H., Griffin, K. & Jayasekara, R. 2001. Developing biodegradable mulch films from starch-based polymers. *Starch-Stärke*, 53, 362-367.
- Hammer, G. L., Cooper, M. & Reynolds, M. P. 2021. Plant production in water-limited environments. *Journal of Experimental Botany*, 72, 5097-5101.
- Hatfield, J. L. & Dold, C. 2019. Water-Use Efficiency: Advances and Challenges in a Changing Climate. *Frontiers in Plant Science*, 10.
- Hetherington, A. M. & Woodward, F. I. 2003. The role of stomata in sensing and driving environmental change. *Nature*, 424, 901-908.
- Hoekstra, A. Y. & Mekonnen, M. M. 2012. The water footprint of humanity. *Proceedings of the National Academy of Sciences*, 109, 3232-3237.
- Jain, R., Kishore, P. & Singh, D. 2020. Irrigation in India: Status, challenges and options. *Journal of Soil and Water Conservation*, 18.
- Kadam, N. N., Yin, X. Y., Bindraban, P. S., Struik, P. C. & Jagadish, K. S. V. 2015. Does Morphological and Anatomical Plasticity during the Vegetative Stage Make Wheat More Tolerant of Water Deficit Stress Than Rice? *Plant Physiology*, 167, 1389-U448.
- Kader, M. A., Senge, M., Mojid, M. A. & Ito, K. 2017. Recent advances in mulching materials and methods for modifying soil environment. *Soil & Tillage Research*, 168, 155-166.
- Kasirajan, S. & Ngouajio, M. 2012. Polyethylene and biodegradable mulches for agricultural applications: a review. *Agronomy for Sustainable Development*, 32, 501-529.
- Kollist, H., Nuhkat, M. & Roelfsema, M. R. G. 2014. Closing gaps: linking elements that control stomatal movement. *New Phytologist*, 203, 44-62.
- Larson, J. E. & Funk, J. L. 2016. Seedling root responses to soil moisture and the identification of a belowground trait spectrum across three growth forms. *New Phytologist*, 210, 827-38.
- Larsson, L. & Jensen, P. 1996. Effects of mulching on the root and shoot growth of young black currant bushes (*Ribes nigrum*). *Acta Agriculturae Scandinavica Section B-Soil and Plant Science*, 46, 197-207.
- Lawson, T. & Vialet-Chabrand, S. 2019. Speedy stomata, photosynthesis and plant water use efficiency. *New Phytologist*, 221, 93-98.

- Lehmann, P., Berli, M., Koonce, J. E. & Or, D. 2019. Surface Evaporation in Arid Regions: Insights From Lysimeter Decadal Record and Global Application of a Surface Evaporation Capacitor (SEC) Model. *Geophysical Research Letters*, 46, 9648-9657.
- Li, F.-M. W., Ping; Wang, Jun; Xu, Jin-Zhang. 2004. Effects of irrigation before sowing and plastic film mulching on yield and water uptake of spring wheat in semiarid Loess Plateau of China. *Agricultural Water Management*, 67, 77-88.
- Liu, E., He, W. & Yan, C. 2014. ‘White revolution’ to ‘white pollution’—agricultural plastic film mulch in China. *Environmental Research Letters*, 9, 091001.
- Marino, F. 1998. *Biodegradation of Paraffin Wax*. Master of Engineering, McGill University.
- Mccormack, L. M., Adams, T. S., Smithwick, E. A. & Eissenstat, D. M. 2012. Predicting fine root lifespan from plant functional traits in temperate trees. *New Phytologist*, 195, 823-831.
- Mishra, H., Reihmer, J. & Gallo Jr., A. 2017. *Compositions and methods relating to functionalized sands (U.S. Patent and Trademark Office; U.S. Department of Commerce, Provisional Patent Application #62550264; <https://patents.google.com/patent/WO2018091986A1/en>)*.
- Moitra, R., Gosh, D. C. & Sarkar, S. 1996. Water use pattern and productivity of rainfed yellow sarson (*Brassica rapa* L. var *glauca*) in relation to tillage and mulching. *Soil and Tillage Research*, 38, 153-160.
- Mukherjee, A. K., M; Sarkar, S. 2010. Role of irrigation and mulch on yield, evapotranspiration rate and water use pattern of tomato (*Lycopersicon esculentum* L.). *Agricultural Water Management*, 98, 182-189.
- Natarajan, S., Basnayake, J., Lakshmanan, P. & Fukai, S. 2021. Genotypic variation in intrinsic transpiration efficiency correlates with sugarcane yield under rainfed and irrigated field conditions. *Physiologia Plantarum*, 172, 976-989.
- Niklas, K. J. 1985. The evolution of tracheid diameter in early vascular plants and its implications on the hydraulic conductance of the primary xylem strand. *Evolution*, 39, 1110-1122.
- Niu, L., Yan, Y. Y., Hou, P., Bai, W. B., Zhao, R. L., Wang, Y. H., Li, S. K., Du, T. S., Zhao, M., Song, J. Q. & Zhou, W. B. 2020. Influence of plastic film mulching and planting density on yield, leaf anatomy, and root characteristics of maize on the Loess Plateau. *Crop Journal*, 8, 548-564.
- Nkurunziza, L., Chirinda, N., Lana, M., Sommer, R., Karanja, S., Rao, I., Romero Sanchez, M. A., Quintero, M., Kuyah, S., Lewu, F., Joel, A., Nyamadzawo, G. & Smucker, A. 2019. The Potential Benefits and Trade-Offs of Using Sub-surface Water Retention Technology on Coarse-Textured Soils: Impacts of Water and Nutrient Saving on Maize Production and Soil Carbon Sequestration. *Frontiers in Sustainable Food Systems*, 3.

- Or, D. & Lehmann, P. 2019. Surface Evaporative Capacitance: How Soil Type and Rainfall Characteristics Affect Global-Scale Surface Evaporation. *Water Resources Research*, 55, 519-539.
- Ouyang, W. J., Struik, P. C., Yin, X. Y. & Yang, J. C. 2017. Stomatal conductance, mesophyll conductance, and transpiration efficiency in relation to leaf anatomy in rice and wheat genotypes under drought. *Journal of Experimental Botany*, 68, 5191-5205.
- Pellegrino, A., Lebon, E., Voltz, M. & Wery, J. 2004. Relationships between plant and soil water status in vine (*Vitis vinifera* L.). *Plant and Soil*, 266, 129-142.
- Porker, K., Straight, M. & Hunt, J. R. 2020. Evaluation of  $G \times E \times M$  Interactions to Increase Harvest Index and Yield of Early Sown Wheat. *Frontiers in Plant Science*, 11.
- Putra, E., Wahab, Z., Abdullah, N. A. & Saleh, G. 2012. Stomatal Morphology, Conductance and Transpiration of *Musa* sp. cv. Rastali in Relation to Magnesium, Boron and Silicon Availability. *American Journal of Plant Physiology*, 7, 84-96.
- Ramalan, A. A. & Nwokeocha, C. U. 2000. Effects of furrow irrigation methods, mulching and soil water suction on the growth, yield and water use efficiency of tomato in the Nigerian Savanna. *Agricultural Water Management*, 45, 317-330.
- Rawitz, E. & Hadas, A. 1994. Efficient Use of Water in Rain-Fed Agriculture. In: Tanji, K. K. & Yaron, B. (eds.) *Management of Water Use in Agriculture*. Berlin, Heidelberg: Springer Berlin Heidelberg.
- Ray, J. D. & Sinclair, T. R. 1998. The effect of pot size on growth and transpiration of maize and soybean during water deficit stress. *Journal of Experimental Botany*, 49, 1381-1386.
- Rebetzke, G. J., Condon, A. G., Richards, R. A. & Farquhar, G. D. 2002. Selection for reduced carbon isotope discrimination increases aerial biomass and grain yield of rainfed bread wheat. *Crop Science*, 42, 739-745.
- Roper, M. M. 2004. The isolation and characterisation of bacteria with the potential to degrade waxes that cause water repellency in sandy soils. *Australian Journal of Soil Research*, 42, 427-434.
- Scanlon, B. R., Faunt, C. C., Longuevergne, L., Reedy, R. C., Alley, W. M., McGuire, V. L. & McMahon, P. B. 2012. Groundwater depletion and sustainability of irrigation in the US High Plains and Central Valley. *Proceedings of the National Academy of Sciences*, 109, 9320-9325.
- Shah, F. & Wu, W. 2020. Use of plastic mulch in agriculture and strategies to mitigate the associated environmental concerns. *Advances in Agronomy, Vol 164*, 164, 231-287.
- Shiklomanov, I. A. 2000. Appraisal and Assessment of World Water Resources. *Water International*, 25, 11-32.
- Sinclair, T. R. 2012. Is transpiration efficiency a viable plant trait in breeding for crop improvement? *Functional Plant Biology*, 39, 359-365.

- Steward, D. R., Bruss, P. J., Yang, X., Staggenborg, S. A., Welch, S. M. & Apley, M. D. 2013. Tapping unsustainable groundwater stores for agricultural production in the High Plains Aquifer of Kansas, projections to 2110. *Proceedings of the National Academy of Sciences*, 110, E3477-E3486.
- Sutanto, S., Wenninger, J., Coenders-Gerrits, A., Uhlenbrook, S. 2012. Partitioning of evapotranspiration into transpiration, soil evaporation and interception: A comparison between isotope measurements and a HYDRUS-1D model. *Hydrology and Earth System Sciences*, 16, 2605–2616.
- Tardieu, F. & Parent, B. 2017. Predictable ‘meta-mechanisms’ emerge from feedbacks between transpiration and plant growth and cannot be simply deduced from short-term mechanisms. *Plant, Cell & Environment*, 40, 846-857.
- Unkovich, M., Baldock, J. & Forbes, M. B. 2010. Chapter 5 - Variability in Harvest Index of Grain Crops and Potential Significance for Carbon Accounting: Examples from Australian Agriculture. *Advances in Agronomy*.
- Vadez, V., Kholova, J., Medina, S., Kakker, A. & Anderberg, H. 2014. Transpiration efficiency: new insights into an old story. *Journal of Experimental Botany*, 65, 6141-6153.
- Vadez, V. & Ratnakumar, P. 2016. High transpiration efficiency increases pod yield under intermittent drought in dry and hot atmospheric conditions but less so under wetter and cooler conditions in groundnut (*Arachis hypogaea* (L.)). *Field Crops Research*, 193, 16-23.
- Wang, C., Wang, H., Zhao, X., Chen, B. & Wang, F. 2015. Mulching affects photosynthetic and chlorophyll a fluorescence characteristics during stage III of peach fruit growth on the rain-fed semiarid Loess Plateau of China. *Scientia Horticulturae*, 194, 246-254.
- Wang, J., Luo, Y., Teng, Y., Ma, W., Christie, P. & Li, Z. 2013. Soil contamination by phthalate esters in Chinese intensive vegetable production systems with different modes of use of plastic film. *Environmental Pollution*, 180, 265-273.
- Watto, M. A., Bashir, S. & Niazi, N. K. 2018a. Pakistan heading for groundwater crisis. *Nature*, 554, 300-300.
- Watto, M. A., Muger, A. W., Kingwell, R. & Saqab, M. M. 2018b. Re-thinking the unimpeded tube-well growth under the depleting groundwater resources in the Punjab, Pakistan. *Hydrogeology Journal*, 26, 2411-2425.
- WWAP 2009. The United Nations World Water Development Report 3: Water in a changing world.
- Yin W, F. Z., Hu F, Yu A, Zhao C, Chai Q, And Coulter J. A. 2019. Innovation in alternate mulch with straw and plastic management bolsters yield and water use efficiency in wheat-maize intercropping in arid conditions. *Nature*, 9.

- Zarebanadkouki, M., Ahmed, M. A. & Carminati, A. 2016. Hydraulic conductivity of the root-soil interface of lupin in sandy soil after drying and rewetting. *Plant and Soil*, 398, 267-280.
- Zhan, A., Liu, J. L., Yue, S. C., Chen, X. P., Li, S. Q. & Bucksch, A. 2019. Architectural and anatomical responses of maize roots to agronomic practices in a semi-arid environment. *Journal of Plant Nutrition and Soil Science*, 182, 751-762.
- Zhang, H. M., Huang, G. H., Xu, X., Xiong, Y. W. & Huang, Q. Z. 2018. Estimating Evapotranspiration of Processing Tomato under Plastic Mulch Using the SIMDualKc Model. *Water*, 10.
- Zhang, H. X., Yunwu; Huang, Guanhua; Xu, Xu; Huang, Quanzhong. 2017a. Effects of water stress on processing tomatoes yield, quality and water use efficiency with plastic mulched drip irrigation in sandy soil of the Hetao Irrigation District. *Agricultural Water Management*, 179, 205-214.
- Zhang, P. W., Ting; Cai, Tie; Ali, Shahzad; Han, Qingfang; Ren, Xiaolong; Jia, Zhikuan. 2017b. Plastic-Film Mulching for Enhanced Water-Use Efficiency and Economic Returns from Maize Fields in Semiarid China. *Frontiers in plant science*, 8, 512.
- Zhang, X. D., Yang, L. C., Xue, X. K., Kamran, M., Ahmad, I., Dong, Z. Y., Liu, T. N., Jia, Z. K., Zhang, P. & Han, Q. F. 2019. Plastic film mulching stimulates soil wet-dry alternation and stomatal behavior to improve maize yield and resource use efficiency in a semi-arid region. *Field Crops Research*, 233, 101-113.
- Zhu, X., Li, Y., Li, M., Pan, Y. & Shi, P. 2013. Agricultural irrigation in China. *Journal of Soil and Water Conservation*, 68.
